# Supplementary material
Source: PubMed Central journal article supplement (PMC5757217)
Supplement: EMBR-19-118-s001.pdf [file EMBR-19-118-s001.pdf]

## Expanded View Figures

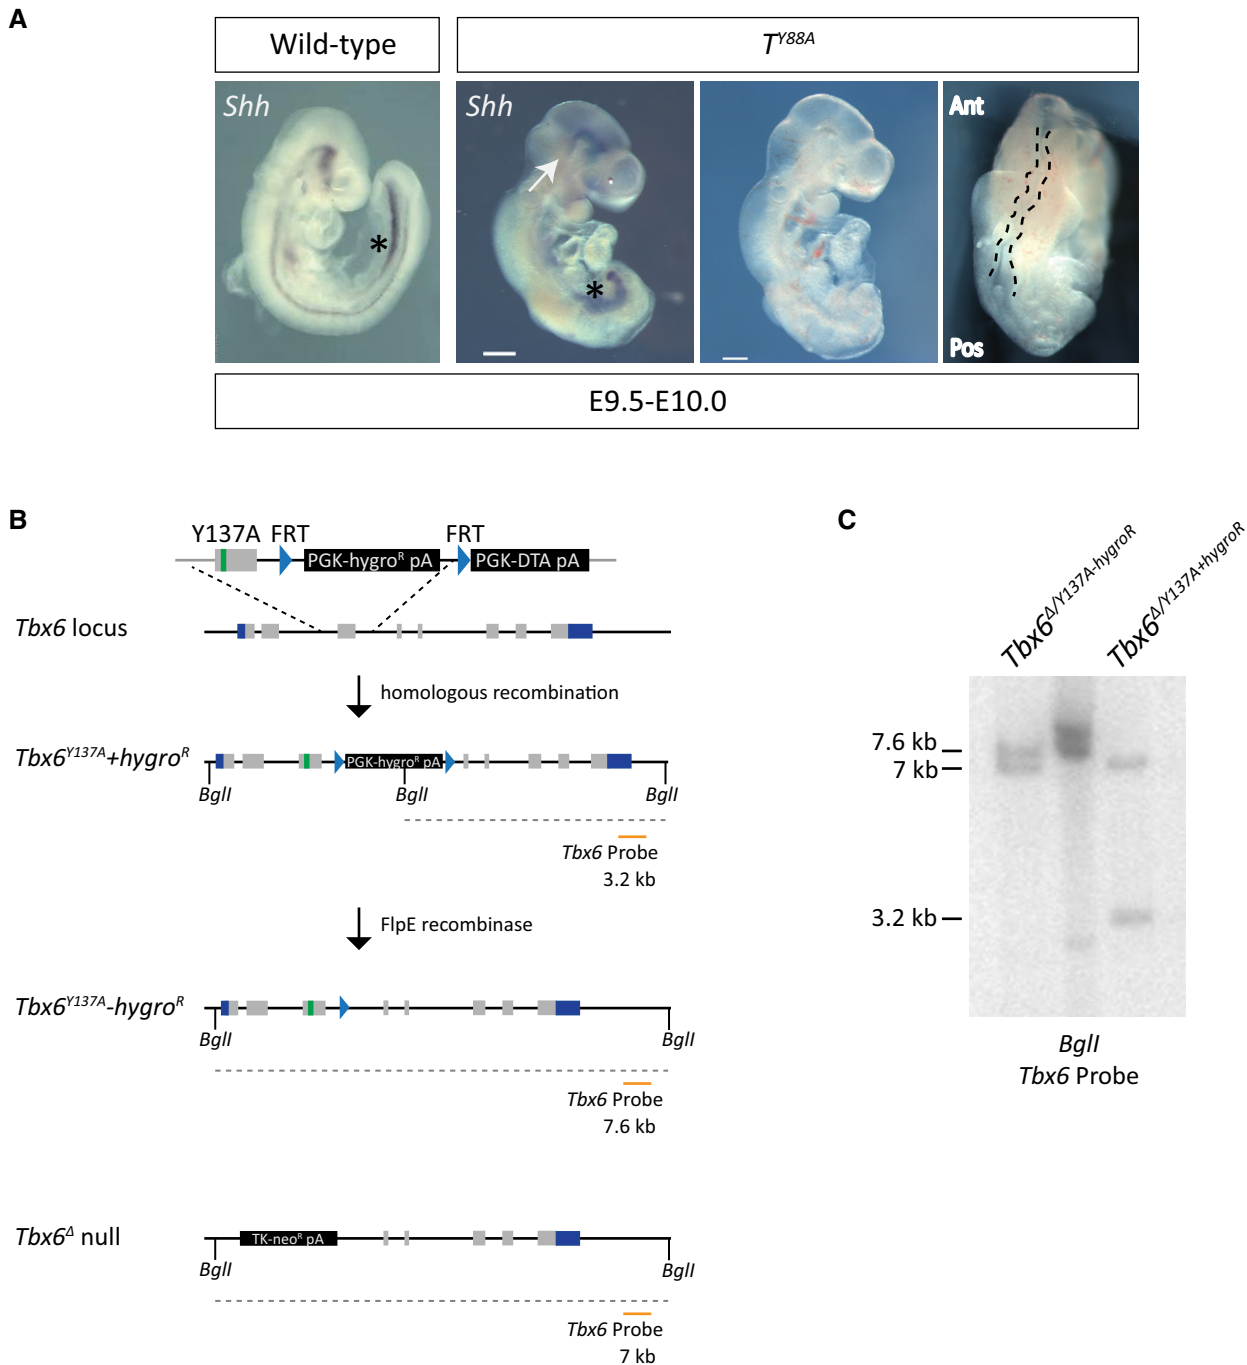

Figure EV1.

**Figure EV1. Y to A mutations in T and Tbx6.**

- A Whole-mount *in situ* hybridization for *Shh* expression reveals the loss of notochordal structures in  $T^{Y88A}$  mutant embryos at E9.5–10.0. White arrows point to the remnants of notochord at the rostral end of the embryo. Asterisks depict *Shh* staining in the foregut. The panels on the right display the kinked neural tube (outlined with a black dashed line) and truncated posterior mesoderm in the  $T^{Y88A}$  mutant embryos at E9.5. The  $T^{Y88A}$  mutant embryo is the same as that in Fig 1F. Scale bar: 200  $\mu$ m. Ant, anterior; Pos, posterior.
- B Schematic illustrating the homologous recombination strategy to insert the Y137A point mutation in the endogenous *Tbx6* locus. The hygromycin selection was removed by expression of *FlpE* recombinase. The orange line depicts the probe used for Southern blotting to confirm integration of the mutation and removal of the hygromycin resistance cassette. *BglII* restriction enzyme sites used for Southern blotting are depicted.
- C Southern blot of mESC genomic DNA to detect homologous recombination of the Y137A mutation and removal of the hygromycin cassette using the probe depicted in (B). The 3.2-kb band corresponds to the  $Tbx6^{Y137A}$  mutant allele containing the hygromycin selection cassette, while the 7.6-kb band corresponds to the  $Tbx6^{Y137A}$  allele with the selection cassette removed. The 7.0-kb band corresponds to the  $Tbx6^{-/-}$  null allele.

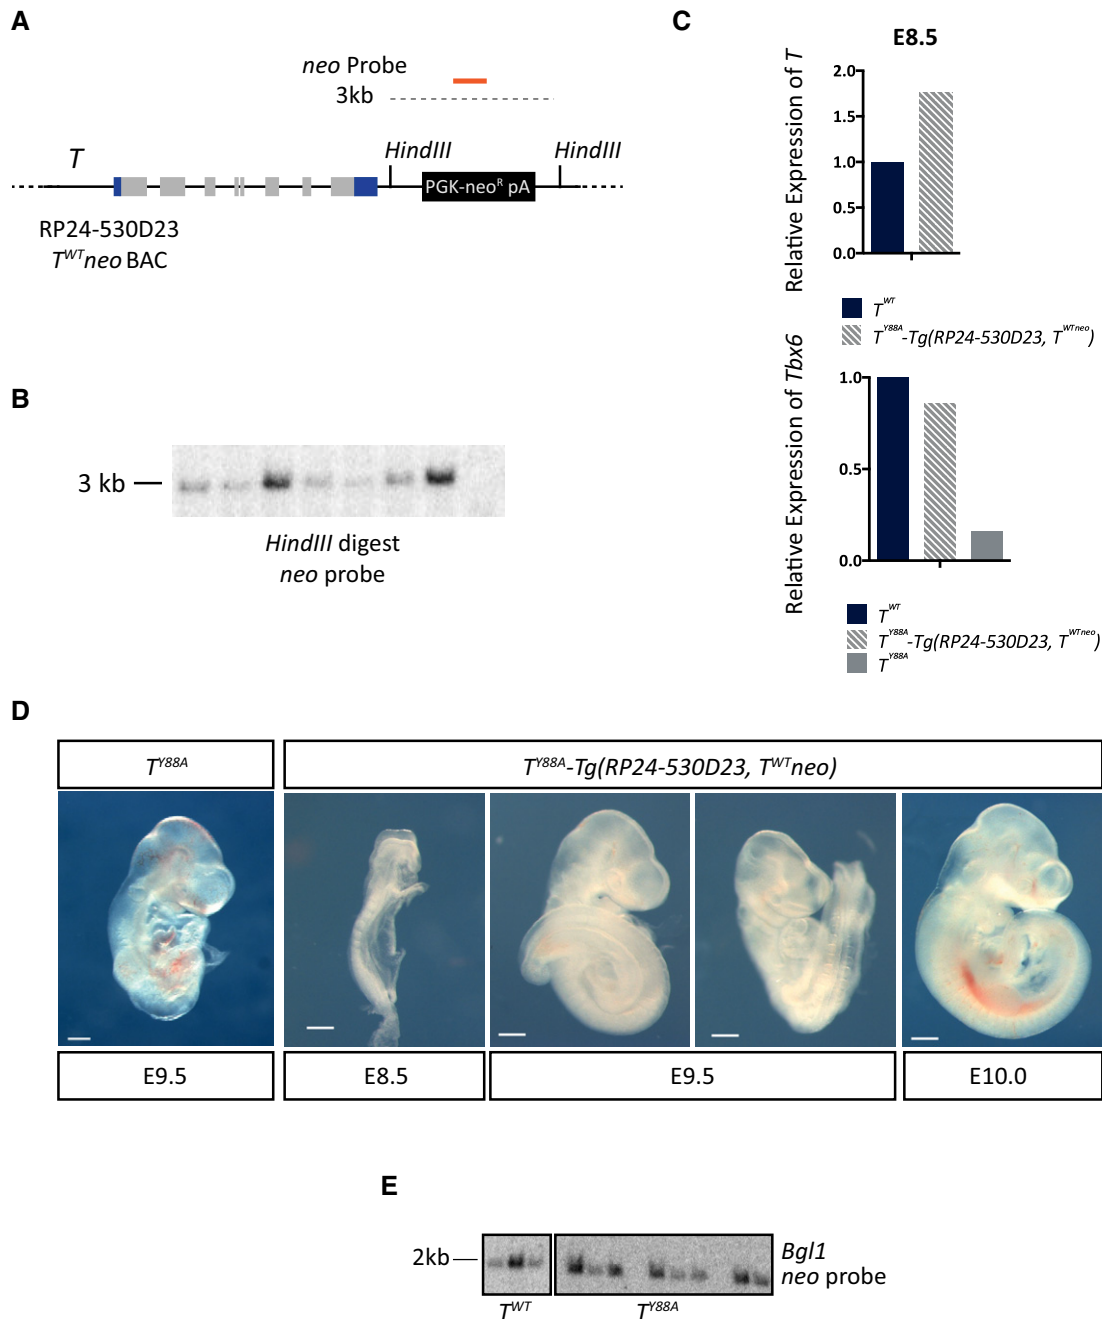

**Figure EV2. The *T* BAC is able to rescue the *T<sup>Y88A</sup>* mutant phenotype.**

- A Schematic illustrating the wild-type RP24-530D23-*T<sup>WT</sup>neo* BAC, containing a neomycin selection cassette recombined into the BAC backbone. The orange line depicts the probe used to confirm genomic integration of the *T<sup>WT</sup>neo* BAC by Southern blot. Restriction enzyme sites used for Southern blotting are also depicted.
- B Southern blot of genomic DNA from *T<sup>Y88A</sup>* mESC clones in which the *T<sup>WT</sup>neo* BAC was randomly integrated. Positive clones display a band at 3 kb when using a probe against the neomycin resistance gene.
- C RT-qPCR analysis of *T* and *Tbx6* expression in whole embryos at E8.5 reveals that *T* expression and *Tbx6* expression are rescued in *T<sup>Y88A</sup>-Tg(RP24-530D23, T<sup>WTneo</sup>)* embryos.
- D Bright field images of *T<sup>Y88A</sup>-Tg(RP24-530D23, T<sup>WTneo</sup>)* embryos from E8.5 to E10.0 reveals rescue of gross morphological phenotypes when compared to the *T<sup>Y88A</sup>* mutant. Scale bar: 200  $\mu$ m.
- E Southern blot of genomic DNA from *T<sup>WT</sup>* and *T<sup>Y88A</sup>* mESC clones in which the *T<sup>mCherry</sup>* reporter BAC was randomly integrated. Positive clones display a band at 2 kb when using a probe against the neomycin resistance gene.

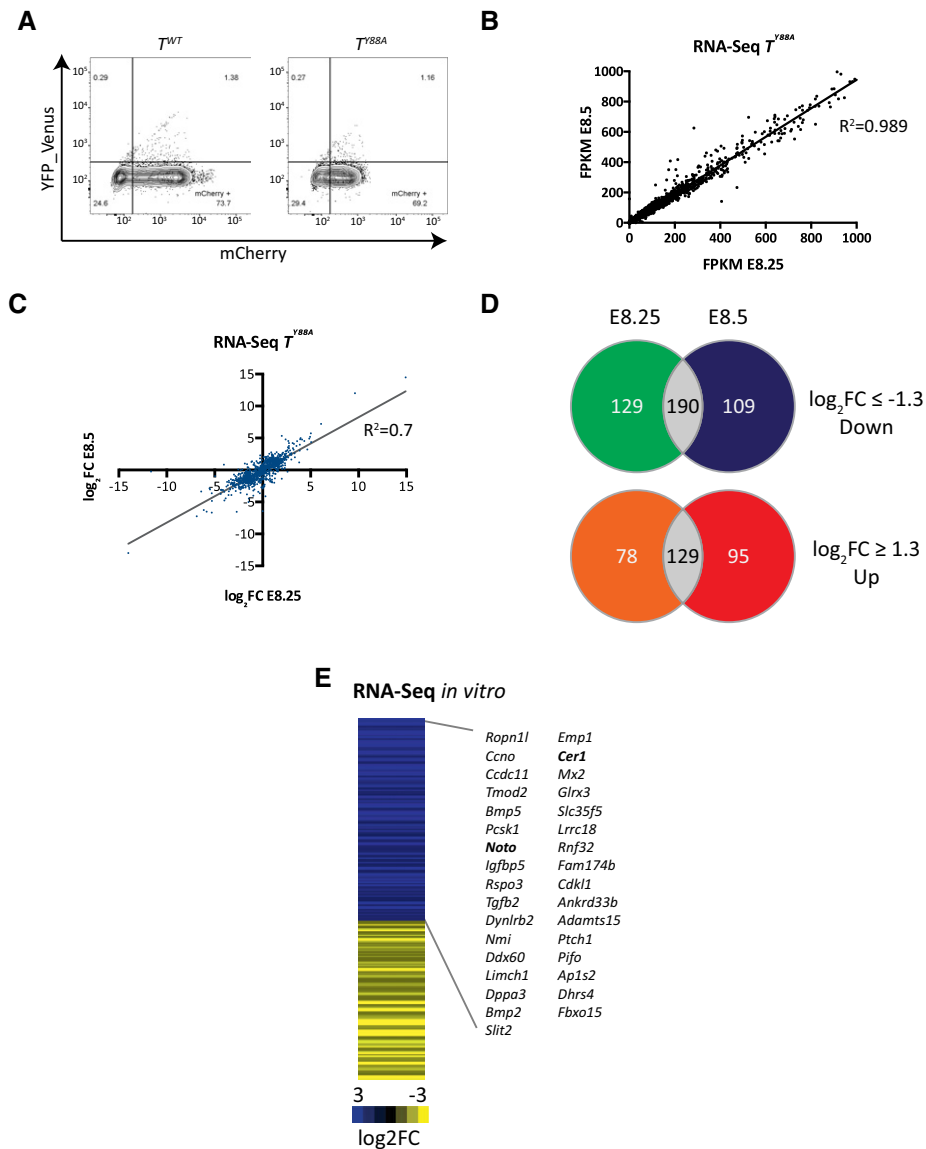

**Figure EV3. Transcriptome analysis in  $T^{Y88A}$  mutants *in vivo*.**

- A FACS plots from the sorting of T-mChERRY-positive cells from  $T^{WT}$  and  $T^{Y88A}$  embryos for RNA-seq.
- B Scatter plot of FPKM values from RNA-Seq using mesodermal cells of  $T^{Y88A}$  embryos at E8.25 and E8.5 (one biological replicate for each timepoint).
- C Scatter plot of  $\log_2$  fold change values comparing  $T^{Y88A}$  mutant mesodermal cells to  $T^{WT}$  at E8.25 and E8.5 ( $\log_2$  fold change  $\geq 1.3$ ).
- D Venn diagrams illustrating genes that are dysregulated both at E8.25 and E8.5 in  $T^{Y88A}$  mutant mesodermal cells compared to  $T^{WT}$  ( $\log_2$  fold change  $\geq 1.3$ ).
- E Heat map depicting dysregulated gene expression ( $\log_2$  fold change  $\geq 1.3$ ) in  $T^{Y88A}$  mesodermal cells differentiated *in vitro* compared to  $T^{WT}$  from RNA-Seq of one biological replicate. Gene names correspond to genes that are downregulated and contain a nearby TBS with reduced H3K27ac (fold change  $> 1.4$ ). Bold gene names indicate known T targets.

**Figure EV4. Disruption of H3K27ac at TBS in the  $T^{Y88A}$  mutant.**

- A MA plots of H3K27me3 ChIP-Seq (one biological replicate) read density  $\pm 1$  kb from transcriptional start sites (TSS, with TBS removed) and TBS. Blue and red lines depict fold change values of  $-1.4$  and  $1.4$ , respectively. The percentage of regions above and below this threshold (red and blue, respectively) are indicated on the plots.
- B MA plot of H3K27ac ChIP-seq (one biological replicate) read density  $\pm 1$  kb from T binding sites and TSS (with TBS removed) in  $T^{WT}$  versus  $T^{Y88A}$  mutant mesodermal cells differentiated *in vitro*. Blue and red lines depict fold change values of  $-1.4$  and  $1.4$ , respectively. The percentage of regions above and below this threshold (red and blue, respectively) are indicated on the plots.
- C Overlap of TBS with higher H3K27me3 and lower H3K27ac (fold change  $> 1.4$ ) from one biological ChIP-Seq replicate each.
- D Genomic distribution of TBS with lower H3K27ac (fold change  $> 1.4$ ).
- E MA plots of H3K27ac read density  $\pm 1$  kb from TBS regions that overlap K4me1 peaks. Blue and red lines depict fold change values of  $-1.4$  and  $1.4$ , respectively. The percentage of regions above and below this threshold (red and blue, respectively) are indicated on the plots.
- F Statistical overrepresentation test (PANTHER) of GO terms from genes nearby regions of lower H3K27ac in  $T^{Y88A}$  mutant mesodermal cells differentiated *in vitro* (fold change  $> 1.4$  when compared to  $T^{WT}$ ). Gray bars indicate fold enrichment over the reference *Mus musculus* gene list.
- G Genome browser tracks depicting T binding in mesodermal cells differentiated *in vitro*, and H3K27ac and H3K27me3 at TBS of target genes.
- H Venn diagram illustrating the overlap between downregulated gene expression from RNA-Seq *in vivo* ( $\log_2$  fold change  $\geq 1.3$ ) and the neighboring two to three genes from each TBS with reduced H3K27ac (fold change  $> 1.4$ ) from one biological ChIP-Seq replicate. The lower Venn diagram illustrates the overlap between downregulated gene expression from RNA-Seq from *in vitro*-differentiated mesodermal cell ( $\log_2$  fold change  $\geq 1.3$ ) and the neighboring two to three genes from each TBS with reduced H3K27ac (fold change  $> 1.4$ ).

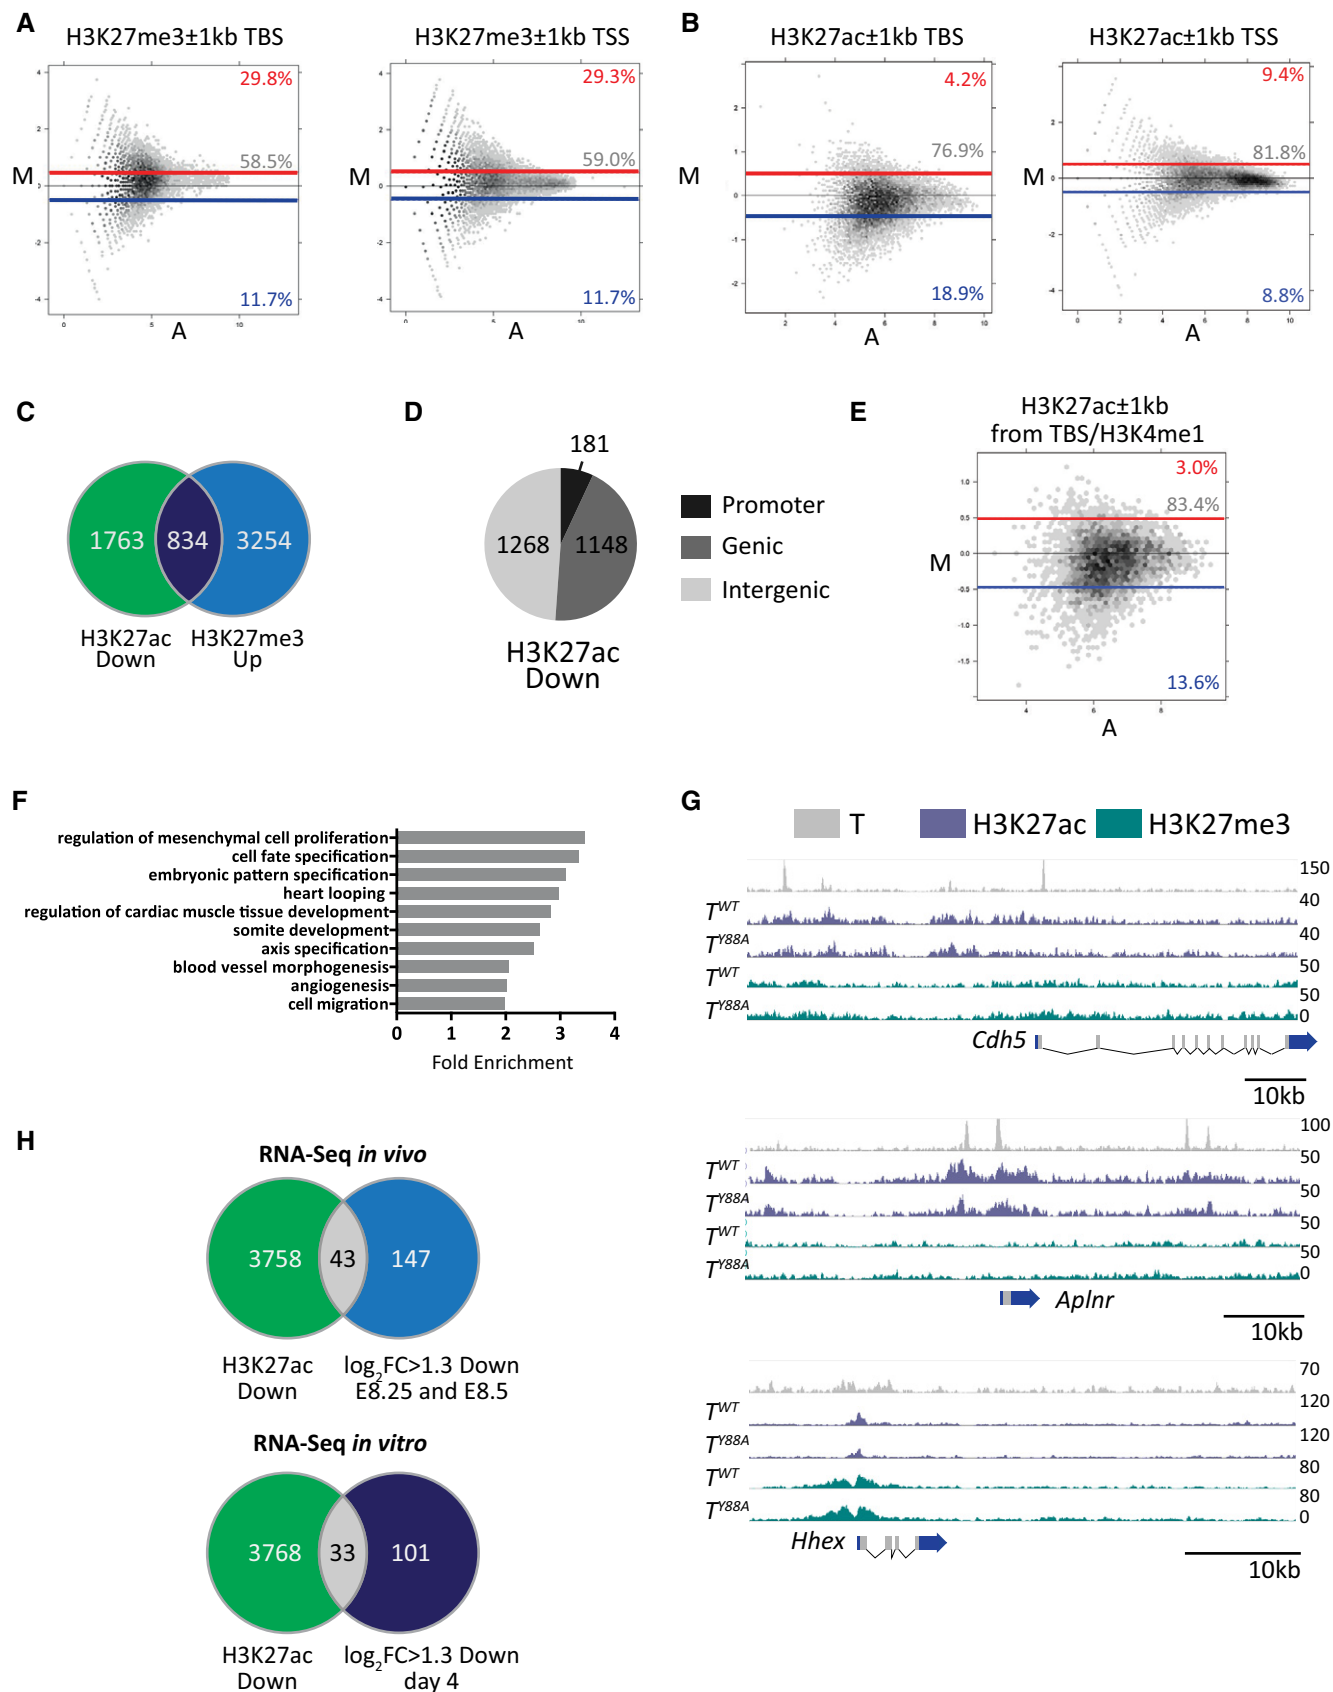

Figure EV4.

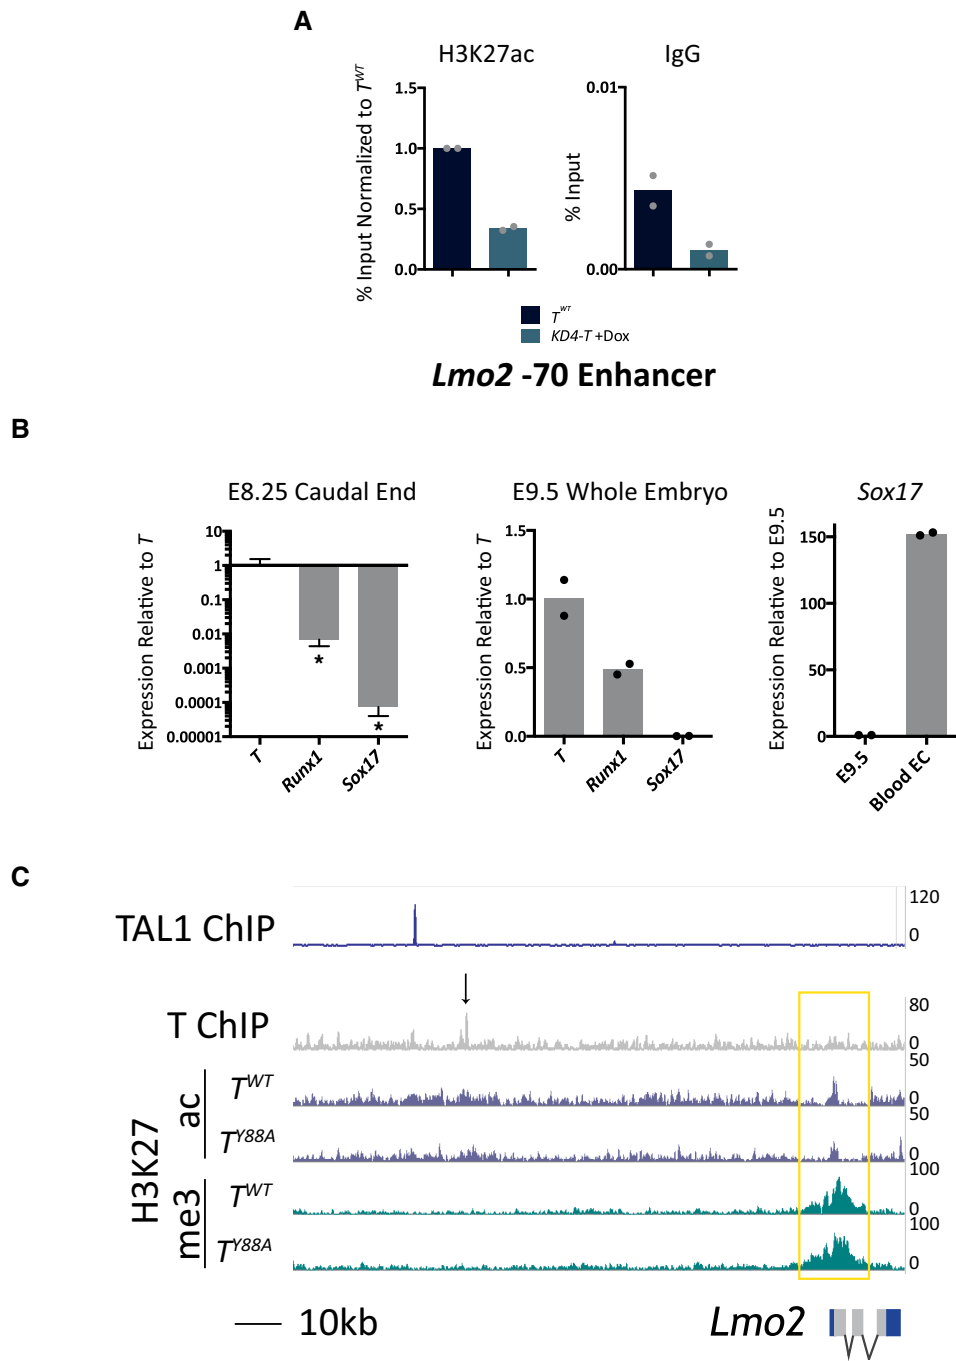

**Figure EV5. T regulation of the *Lmo2* locus.**

- A ChIP-qPCR analysis of H3K27ac at the *Lmo2* -70 enhancer in *KD4-T* *in vitro*-differentiated mesodermal cells at day 4. The mean of  $n = 2$  biological replicates is depicted.
- B RT-qPCR analysis of *T*, *Runx1*, and *Sox17* expression in E8.25 caudal ends of  $T^{WT}$  embryos. Levels of *Runx1* and *Sox17* are significantly lower than that of *T* in E8.25 caudal ends. Error bars depict SD of  $n = 3$  biological replicates.  $*P < 0.02$  using an unpaired *t*-test. Middle graph depicts *T*, *Runx1*, and *Sox17* levels in whole E9.5 embryos as a positive control for the qPCR primers. The mean of  $n = 2$  biological replicates is depicted. *Sox17* expression is low in E9.5 embryos, and the graph on the right depicts high *Sox17* expression in CD31<sup>+</sup> blood endothelial cells isolated from embryonic skin at E15.5. The mean of  $n = 2$  biological replicates is depicted.
- C Genome browser tracks of the *Lmo2* genomic locus with T, H3K27ac, and H3K27me3 tracks from the ChIP-Seq analysis in this study. TAL1 ChIP-Seq tracks were depicted using data from [45], and illustrate TAL1 binding in mesodermal cells at the *Lmo2* -75 enhancer, approximately 7 kb upstream of T binding at the -70 enhancer. The black arrow indicates the region removed by CRISPR/Cas9-mediated genome editing at the TBS of the *Lmo2* -70 enhancer.
